# Supplementary material for: The effect of thermal annealing on the charge transfer dynamics of a donor–acceptor copolymer and fullerene: F8T2 and F8T2:PCBM
Source: Royal Society of Chemistry journal article supplement (doi:10.1039/c5cp01285f), 2015-01-01
Supplement: c5cp01285f1.pdf [file c5cp01285f1.pdf]

## **Supplementary Information File**

### **The effect of thermal annealing in the charge transfer dynamics of a donor-acceptor copolymer and fullerene: F8T2 and F8T2:PCBM**

Yunier Garcia-Basabe,<sup>a,\*</sup> Natasha A. D. Yamamoto,<sup>b</sup> Lucimara S. Roman<sup>b</sup> and

Maria Luiza M. Rocco<sup>a,\*</sup>

<sup>a</sup>*Institute of Chemistry, Federal University of Rio de Janeiro, Rio de Janeiro, 21941-909, Brazil*

<sup>b</sup>*Department of Physics, Federal University of Paraná, Curitiba, 81531-990, Brazil*

\*Corresponding author. Tel.: +55-21-3938-7786; Fax: +55-21-3938-7265.

E-mail address: [yunier@iq.ufrj.br](mailto:yunier@iq.ufrj.br) (Y. Garcia-Basabe). and [luiza@iq.ufrj.br](mailto:luiza@iq.ufrj.br) (M.L.M.Rocco)

This Supporting Information is composed by one section:

1. Supporting Figures (Figure SI1 to Figure SI4).

## Figure Captions

**Figure SI1.** Sulfur  $KL_{2,3}L_{2,3}$  spectra measured at 2482 eV photon energy for as-cast F8T2-S20 (a) and thermal annealed F8T2-S200 (b) polymeric films.

**Figure SI2.** Peak position (a) and b)) and FWHM (c) and d)) plotted against incident photon energy obtained by deconvolution of the S- $KL_{2,3}L_{2,3}$  spectra for F8T2-S20 and F8T2-S200.

**Figure SI3.** Peak fitting procedure of S- $KL_{2,3}L_{2,3}$  RAS spectra measured at different photon energies for as-cast F8T2:PCBM-S20.

**Figure SI4.** Peak fitting procedure of S- $KL_{2,3}L_{2,3}$  RAS spectra measured at different photon energies for F8T2:PCBM-S200.

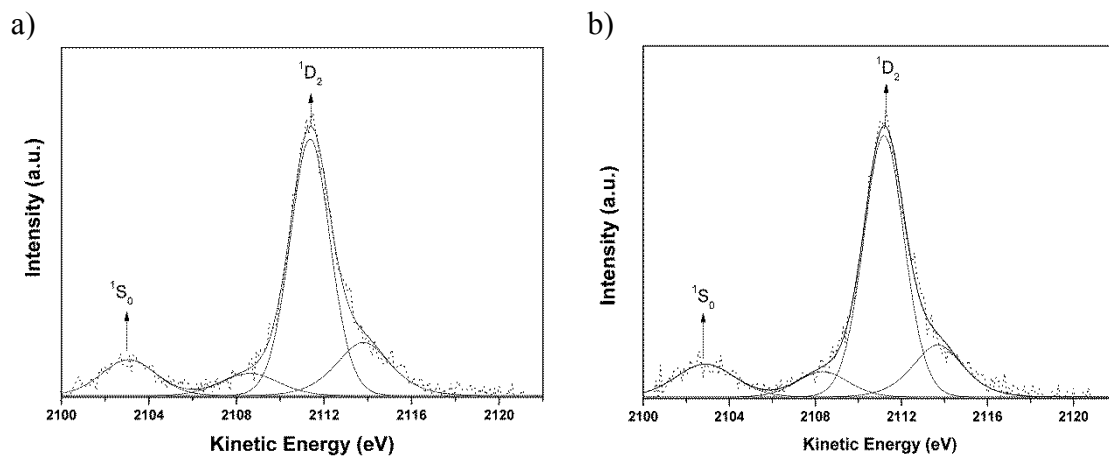

**Figure S11.** Sulfur  $KL_{2,3}L_{2,3}$  spectra measured at 2482 eV photon energy for as-cast F8T2-S20 (a) and thermal annealed F8T2-S200 (b) polymeric films.

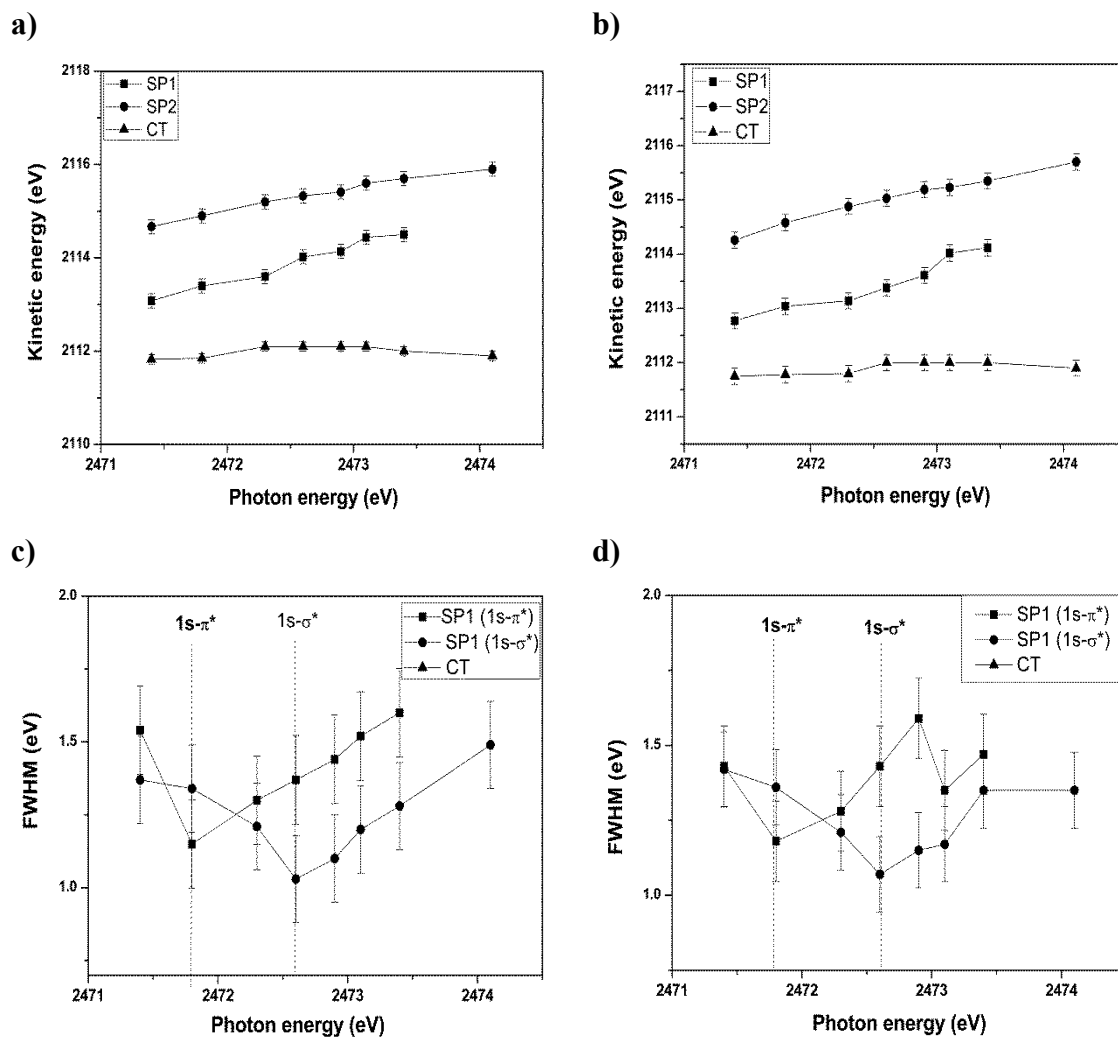

**Figure S12.** Peak position (a) and b)) and FWHM (c) and d)) plotted against incident photon energy obtained by deconvolution of the  $S-KL_{2,3}L_{2,3}$  spectra for F8T2-S20 and F8T2-S200. Error bar are include in the plot.

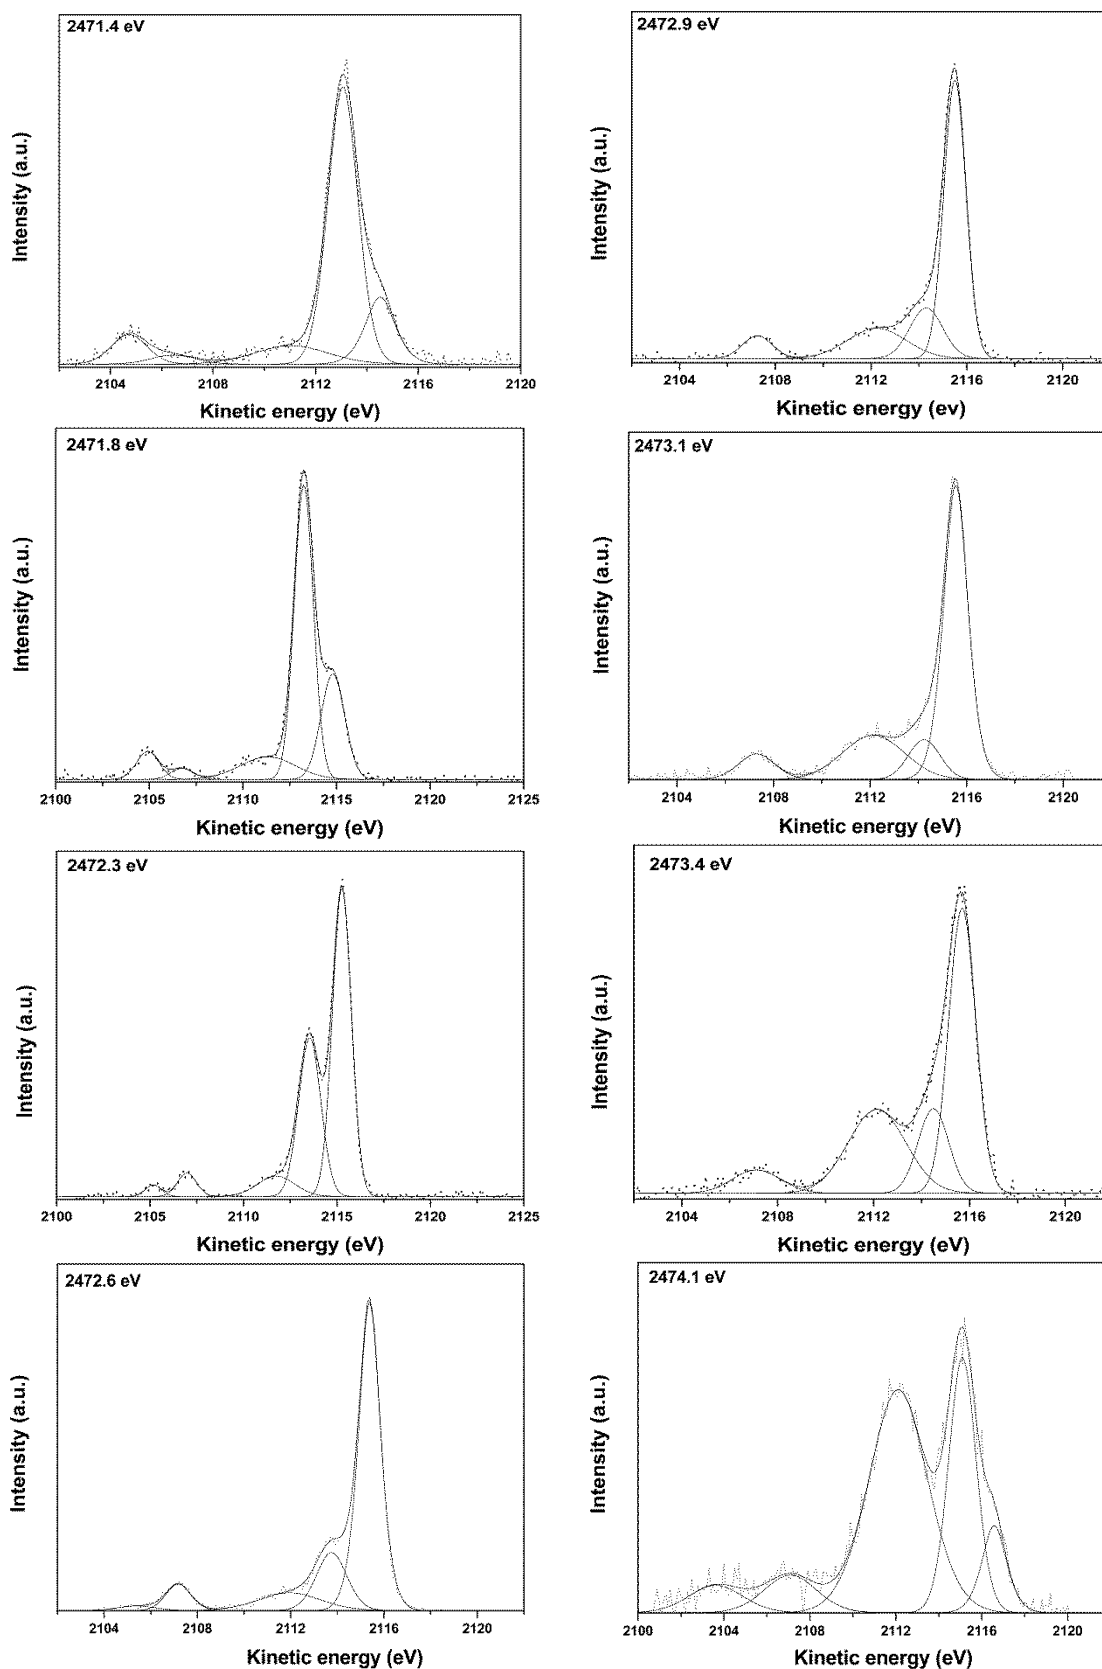

**Figure SI3.** Peak fitting procedure of  $S\text{-}KL_{2,3} L_{2,3}$  RAS spectra measured at different photon energies for as-cast F8T2:PCBM-S20.

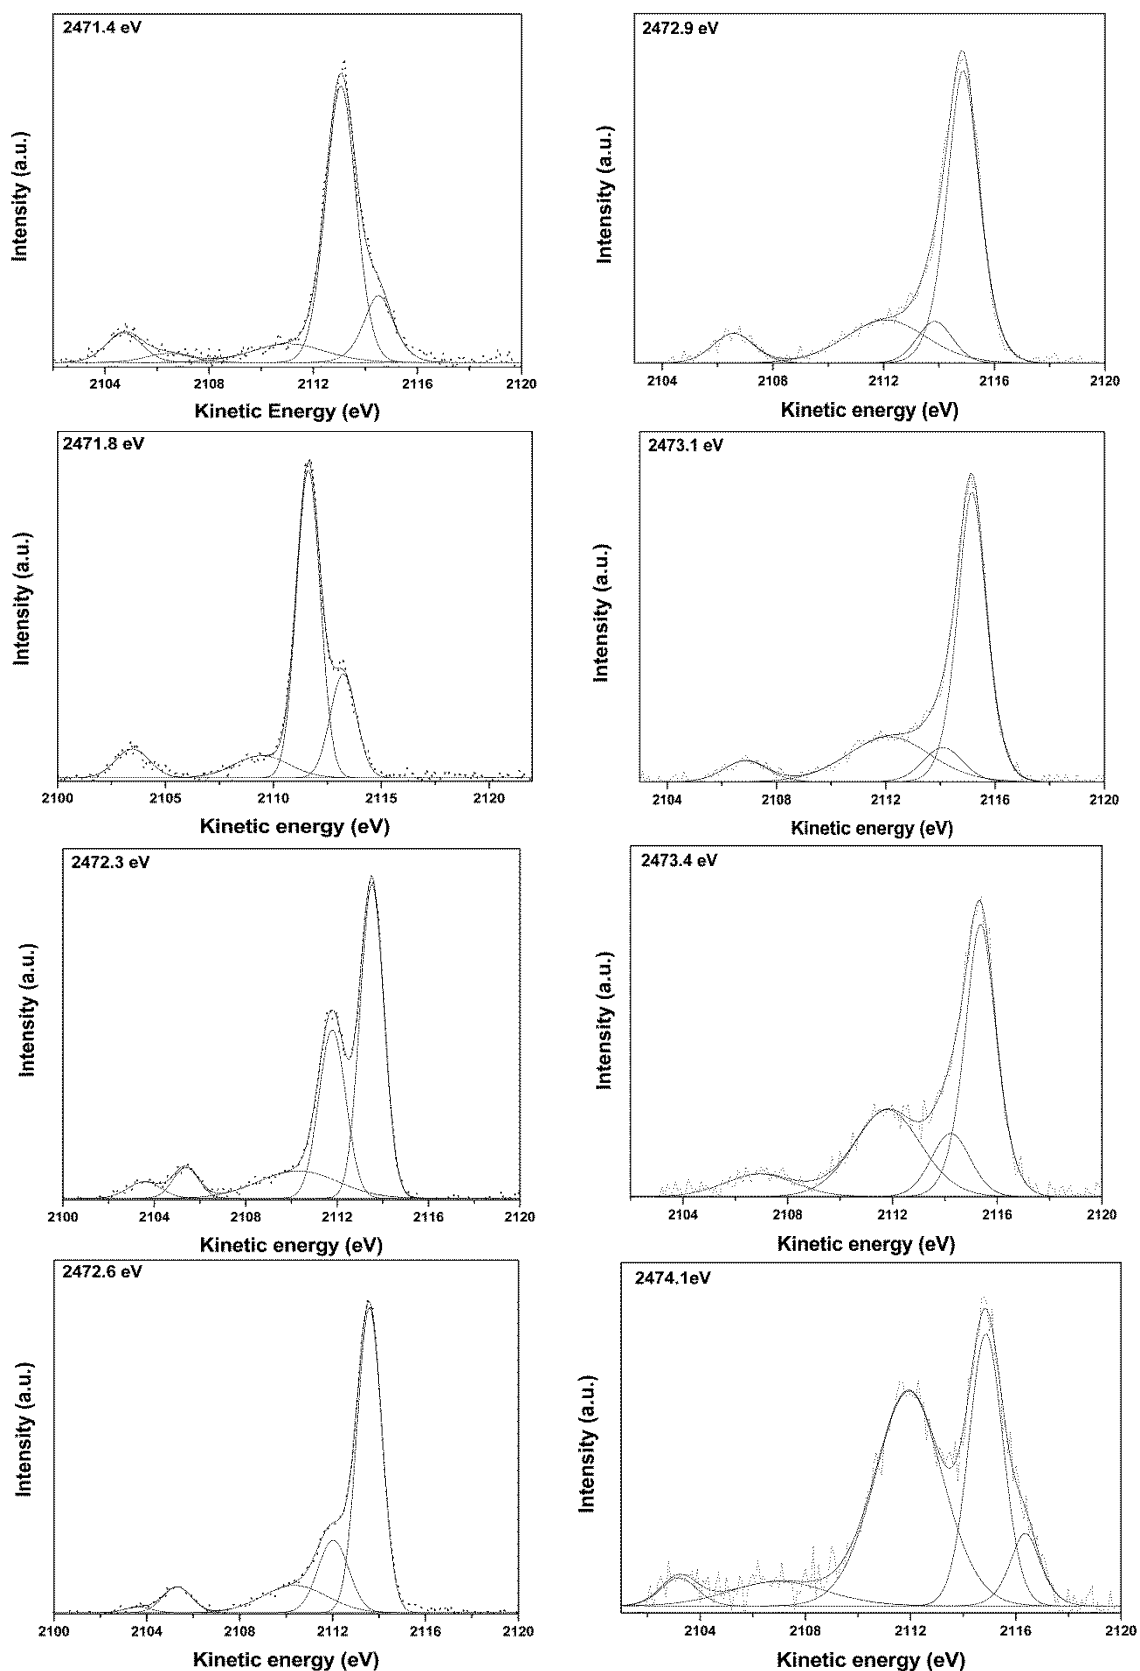

**Figure SI4.** Peak fitting procedure of  $S\text{-}KL_{2,3} L_{2,3}$  RAS spectra measured at different photon energies for F8T2:PCBM-S200.
